# Supplementary material
Source: PubMed Central journal article supplement (PMC3915716)
Supplement: NIHMS548897-supplement-1.pdf [file NIHMS548897-supplement-1.pdf]

# Pluquet et al., Supplemental information

## Supplemental Tables

**Table S1: Genes up-regulated in IRE1<sub>DN</sub> cells compared to EV cells.** To determine genes whose expression increased when IRE1 $\alpha$  is inactivated, probe set intensities were obtained by means of GCRMA and were selected by using a corrected *P* value threshold of 0.05 and fold change threshold of  $|\log_2(\text{fc})| \geq 2.5$ . The gene set was analyzed by functional annotation using the web-based tools provided by the DAVID resource (<http://david.abcc.ncifcrf.gov>) among the non-secreted targets. The most significant biological process found was PANTHER BP00044: mRNA transcription regulation (pvalue < 0.01)

| Gene                                                             | Name  | Log2 (Fold Change) | Probesets   |
|------------------------------------------------------------------|-------|--------------------|-------------|
| LIM domain binding 2                                             | LDB2  | 4,68               | 206481_s_at |
| Forkhead box N3                                                  | FOXN3 | 3,96               | 218031_s_at |
| T-box 3                                                          | TBX3  | 3,85               | 219682_s_at |
| Kruppel-like factor 11                                           | KLF11 | 3,84               | 218486_at   |
| Transducin-like enhancer of split 4 (E(sp1) homolog, Drosophila) | TLE4  | 2,90               | 204872_at   |
| Retinoic acid receptor, beta                                     | RARB  | 2,89               | 205080_at   |
| Transducin-like enhancer of split 1 (E(sp1) homolog, Drosophila) | TLE1  | 2,84               | 203222_s_at |
| Period homolog 1 (Drosophila)                                    | PER1  | 2,71               | 202861_at   |
| Forkhead box O1A                                                 | FOXO1 | 2,68               | 202724_s_at |
| V-myb myeloblastosis viral oncogene homolog (avian)-like 1       | MYBL1 | 2,58               | 213906_at   |
| SRY (sex determining region Y)-box 9                             | SOX9  | 2,57               | 202935_s_at |

**Table S2: Identification of the potential IRE1 $\alpha$ -mediated cleavage sites found on *Per1* mRNA.** This was carried out using the combination of sequence alignment and RNA structural analyses carried out with the *M-fold* program.

| Site | Potential 5' cleavage product (bases) | Potential 3' cleavage product (bases) |
|------|---------------------------------------|---------------------------------------|
| 1    | 611                                   | 4106                                  |
| 2    | 1476                                  | 3241                                  |
| 3    | 1920                                  | 2797                                  |
| 4    | 3197                                  | 1520                                  |
| 5    | 3378                                  | 1339                                  |

**Table S3: Characteristics of 20 glioblastoma samples towards XBP1s protein expression and localization.** *The case # is indicated as well as the grade of the tumor, the type of staining observed using immunohistochemistry and revealed using diaminobenzidine and horseradish peroxidase. The age, sex and survival (days) of patients is also indicated.*

|    | <b>Grade</b> | <b>XBP1s staining</b> | <b>Age</b> | <b>Sex</b> | <b>Survival (Days)</b> |
|----|--------------|-----------------------|------------|------------|------------------------|
| 1  | 4            | No staining (D)       | 49         | F          | 530                    |
| 2  | 4            | Cytoplasmic (E)       | 71         | M          | 207                    |
| 3  | 4            | Cytoplasmic (E)       | 51         | F          | 261                    |
| 4  | 4            | No staining (D)       | 33         | M          | 507                    |
| 5  | 4            | Cytoplasmic (E)       | 46         | M          | 264                    |
| 6  | 4            | Nuclear (F)           | 57         | F          | 144                    |
| 7  | 4            | No staining (D)       | 36         | F          | 702                    |
| 8  | 4            | Cytoplasmic (E)       | 43         | F          | 85                     |
| 9  | 4            | Cytoplasmic (E)       | 71         | F          | 173                    |
| 10 | 4            | No staining (D)       | 74         | M          | 13                     |
| 11 | 4            | Cytoplasmic (E)       | 53         | F          | 261                    |
| 12 | 4            | Cytoplasmic (E)       | 41         | M          | 305                    |
| 13 | 4            | No staining (E)       | 50         | M          | 387                    |
| 14 | 4            | Cytoplasmic (E)       | 80         | F          | 56                     |
| 15 | 4            | Cytoplasmic (E)       | 64         | F          | 104                    |
| 16 | 4            | Cytoplasmic (E)       | 52         | F          | 452                    |
| 17 | 4            | Cytoplasmic (E)       | 74         | F          | 100                    |
| 18 | 4            | Cytoplasmic (E)       | 46         | M          | 249                    |
| 19 | 4            | No staining (D)       | 44         | M          | 469                    |
| 20 | 4            | Cytoplasmic (E)       | 57         | M          | 64                     |

**Table S4: Primer Pairs used for PCR and qPCR studies.**

| Gene ID        | Accession number | FWD                               | REV                               |
|----------------|------------------|-----------------------------------|-----------------------------------|
| <i>PCR</i>     |                  |                                   |                                   |
| hPer1 e13-16   | NM_002616        | 5'-GGGTCCTCCAGTGATAGCAA-3'        | 5'-GAGGAGGAGGCACATTTACG-3'        |
| hGapdh         | NM_002046        | 5'-ACCACCATGGAGAAGGCTGG-3'        | 5'-CTCAGTGTAGCCCAGGATGC-3'        |
| hXbp1          | NM_005080        | 5'-GGAAACAGCAAGTGGTAGA-3'         | 5'-CTCAGTGTAGCCCAGGATGC-3'        |
| hIre1 $\alpha$ | NM_001433        | 5'-GGCCTGGTCACCACAATTAG-3'        | 5'-ATTCCCTCCTCCTCCT-3'            |
| Ire1-Nck       | -----            | 5'-TCATCACCTATCCCCTGAGC-3'        | 5'-AGATGCTTTCCGAGCACTGT-3'        |
| hOrp150        | NM_006389        | 5'-GAAGATGCAGAGCCCATTTC-3'        | 5'-TCTGCTCCAGGACCTCCTAA-3'        |
| <i>qPCR</i>    |                  |                                   |                                   |
| hPer1 e4-8     | NM_002616        | 5'-CAAGGACTCAGAAGGAACTCATGACAG-3' | 5'-GTACCGAGGCCCTGGATCCCGGTCAG-3'  |
| hPer1 e23      | NM_002616        | 5'-CAGGACTTGGCTATGGAGGA-3'        | 5'-AGGCTCAGCTGGAATATGGA-3'        |
| hPer1          | NM_002616        | 5'-AGGAAGGAGACAGCCACTGA-3'        | 5'-TATACCCTGGAGGAGCTGGA-3'        |
| hPer2          | NM_022817        | 5'-TACGCTGGCCACCTTGAAGTA-3'       | 5'-CACATCGTGGAGCGCCAGGA-3'        |
| hXrn1          | NM_019001        | 5'-GATGGATCTCAGAGCGGTATCC-3'      | 5'-CAGGTACAAGTTGTCAAATTCAGGAA-3'  |
| hXrn2          | NM_012255        | 5'-CGCAAGTACCCGTCCATCA-3'         | 5'-CTGGAATCTTTACACCATTGCATT-3'    |
| hSki2          | NM_006929        | 5'-ACTGGGAGCTGTGAACTTG-3'         | 5'-CCATGGGGAAGGCTACTCTC-3'        |
| Rplp0          | NM_007475        | 5'-GGCGACCTGGAAGTCCAAC-3'         | 5'-CCATCAGCACCACAGCCTTC-3'        |
| CXCL3          | NM_002090        | 5'-TCCCCATGGTTCAGAAAATC-3'        | 5'-GGTGTCCCCTTGTTCAGTATCT-3'      |
| Axin2          | NM_004655        | 5'-TGCTCTGTTTTGTCTTAAAGTCTTGA-3'  | 5'-ACAGATCATCCCATCCAACACA-3'      |
| Cyclin D1      | NM_053056        | 5'-AATGACCCCGCACGATTCA-3'         | 5'-CTCCCCGCTGCCACCAT-3'           |
| GPR49          | NM_003667        | 5'-GAGGATCTGGTGAGCTGAGAA-3'       | 5'-GATGCTGGAGCTGGTAAAGGT-3'       |
| Cyclin B1      | NM_031966        | 5'-CGGGAAGTCACTGGAACAT-3'         | 5'-AAACATGGCAGTGACACCAA-3'        |
| Cdc2           | NM_001786        | 5'-CAGTCTTCAGGATGTGCTTATGC-3'     | 5'-GAGGTTTTAAGTCTCTGTGAAGAACTC-3' |
| Wee1           | NM_003390        | 5'-ATTTCTCTGCGTGGGCAGAAAG-3'      | 5'-CAAAGGAGATCCTTCAACTCTGC-3'     |
| Bip            | NM_005347        | 5'-GCTTATGGCCTGGATAAGAGG-3'       | 5'-CCACAACCTCGAAGACACCAT-3'       |
| Chop           | NM_001195053     | 5'-AAGGCACTGAGCGTATCATGT-3'       | 5'-TGAAGATACACTTCTTCTTGAAC-3'     |
| Edem           | NM_014674        | 5'-AGTCATCAACTCCAGCTCAA-3'        | 5'-AACCATCTGGTCAATCTGTGC-3'       |
| ERdj4          | NM_012328        | 5'-TGGTGGTTCAGTAGACAAAGG-3'       | 5'-CTTCGTTGAGTGACAGTCTGC-3'       |
| GRP94          | NM_003299        | 5'-CCCCATGGCTTATATCACTTTAC-3'     | 5'-TCTTGTTTTCTTCACTTCTTCC-3'      |
| SEC61          | NM_013336        | 5'-CTTAGTGTGCTGCCAGATTCC-3'       | 5'-CTCCATCAATGTGCCTCTGTT-3'       |
| XBP1s          | NM_001079539     | 5'-GGAAACAGCAAGTGGTAGA-3'         | 5'-CTGGAGGGGTGACAAC-3'            |

**Table S5: siRNA sequences**

| Gene ID       | Sequence                   |
|---------------|----------------------------|
| GL2           | 5'-CGUACGCGGAAUACUUCGA-3'  |
| Ire1 $\alpha$ | 5'-UUACUGGCUUCUGAUAGGA-3'  |
| Xrn1          | 5'-GCCUUUGUCUCCUAACUGA-3'  |
|               | 5'-UCCUCAAUUGUGUAUAAUUA-3' |
| Xrn2          | 5'-UUCAGUAUUUCUUUGGAAA-3'  |
|               | 5'-CAGUGGAUCUGAAUUUAUU-3'  |
| Ski2          | 5'-CAGAGAAACGGCUAUGAGA-3'  |
|               | 5'-CCGUUAUCCUGCUCUGCAA-3'  |
| Xbp1          | 5'-CUCAUGGCCUUGUAGUUGA-3'  |

## Supplemental Experimental Procedures

*Assay for cell growth (SRB)* - The SRB assay was performed as previously described (Vichai and Kirtikara, 2006). Briefly, cells were seeded into 96-well plates in 100  $\mu$ l at a density of 5000 cells/well. After cell inoculation, the plates were incubated at 37°C for 24, to 96 h. Cells were then fixed in situ with trichloroacetic acid and stained with sulforhodamine B (Sigma, St Louis, MO, USA). Absorbance was measured at 510 nm.

*Data analyses* - All experiments were performed at least 3 times. Assays were analyzed using a paired or unpaired t-test or ANOVA following Newman-Keuls or Bonferroni test as appropriate, performed with GraphPad Prism software (GraphPad Software, San Diego, CA, USA).

*Antibodies*- Antibodies against PDGFRB were purchased from Santa Cruz Biotechnology, against BAK, p53 and Bcl2 from Calbiochem, against p21 from Cell Signaling Technology, and against fibronectin from BD Biosciences. Proteins were detected using secondary antibodies coupled to HRP (Dako SA) and immunoblots revealed using enhanced chemiluminescence and radioautography.

## Supplemental Figures

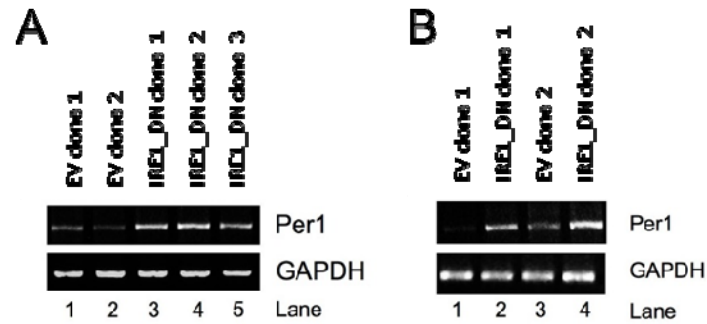

**Figure S1:** (A) Total RNA was isolated in different clones of U87 cells carrying either empty vector (EV) or IRE1\_DN vector and assayed for *Per1* mRNA expression levels. (B) The same as in (A) in HepG2 cells.

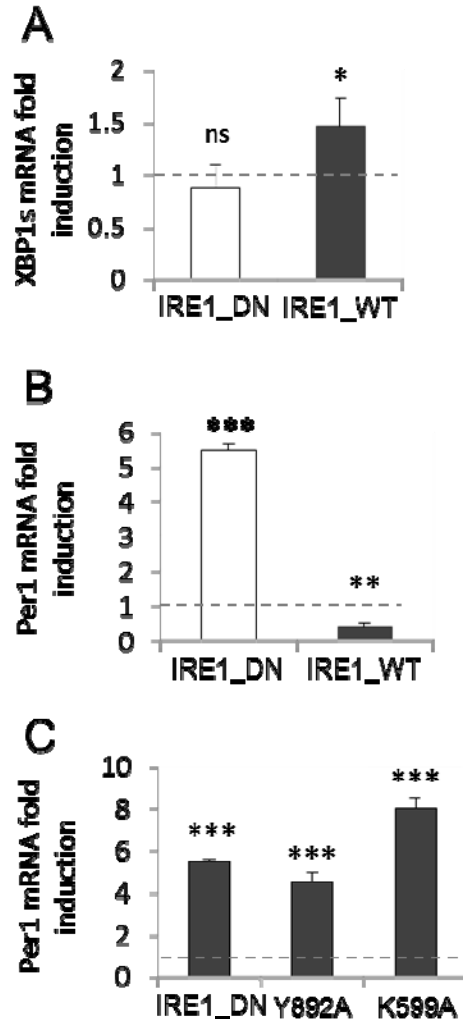

**Figure S2:** RT-qPCR of the spliced form of XBP1 (A) or *PER1* (B) and (C), performed on total RNA isolated from U87 transfected with IRE1 $\alpha$ -WT or IRE1\_DN and or RNase dead Y892A or kinase dead K599A IRE1 $\alpha$  mutants. Data are representative of three independent experiments. Values were normalized to 18S rRNA and then to the control condition for each experiment. The dash line represents the control value (1). The experiment was carried out in triplicate and is presented as the mean  $\pm$  SD. \*,  $p < 0.05$ ; \*\*,  $p < 0.01$ , \*\*\*  $p < 0.001$ . As previously shown (Han et al., Cell, 2009), IRE1 $\alpha$  overexpression resulted in XBP1 splicing (A). On the contrary, *PER1* mRNA levels increased in response to IRE1 $\alpha$  mutant transfections (B) and (C).

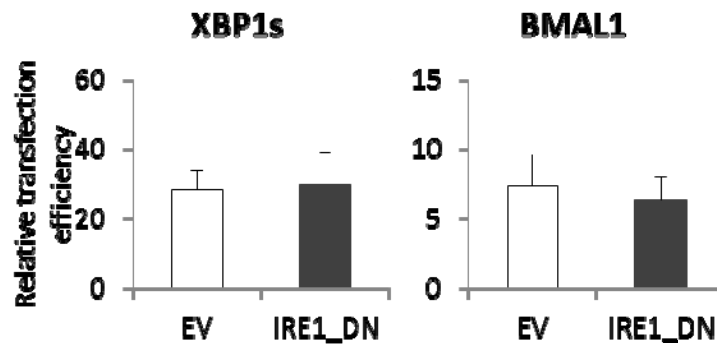

**Figure S3:** determination of the amount of plasmids (XBP1s or BMAL1) transfected in EV and IRE1\_DN cells, as determined by PCR. Data are presented as the mean  $\pm$  SD.

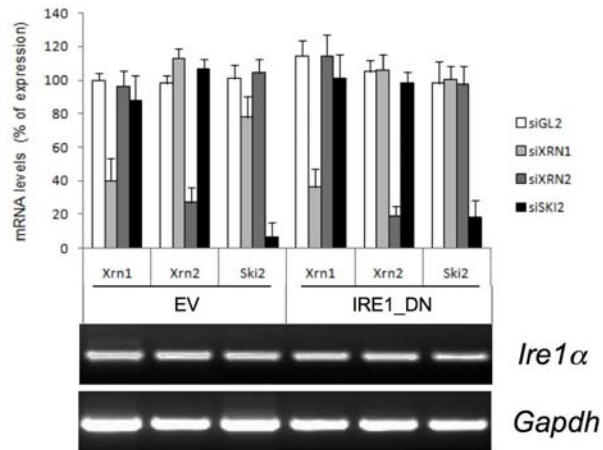

**Figure S4:** EV or IRE1\_DN cells were transfected with siRNA against XRN1/2 or SKI2. RNA was isolated after 48 h and used to quantify XRN1/2 or SKI2 mRNA in control (siGL2) and RNAi-treated cells to determine the efficacy and specificity of RNA interference. Data are representative of at least three independent experiments. For each experimental condition, the expression level of *Ire1α* mRNA was determined by RT-PCR and reported to that of *Gapdh* (bottom panel).



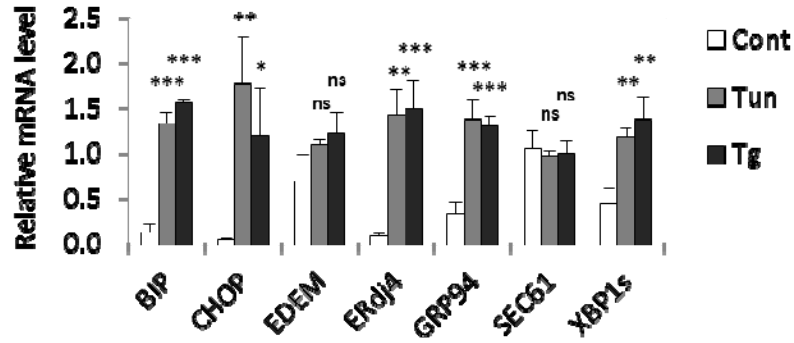

**Figure S5:** assessment of basal UPR in U87. Total RNA was isolated in U87 cells treated or not with ER stressors tunicamycin (Tun, 10  $\mu$ g/ml, 6 h) or thapsigargin (Tg, 1  $\mu$ M, 6 h) and assayed for UPR targets or control non-target (SEC61) mRNA expression levels. Data are presented as the mean  $\pm$  SD. For each gene and experiment, values were normalized to the mean of all conditions. Statistical significance: \*,  $p < 0.05$ ; \*\*,  $p < 0.01$ , \*\*\*  $p < 0.001$ . Excepted for EDEM and control SEC61, all UPR target gene expressions were statistically increased under stress.

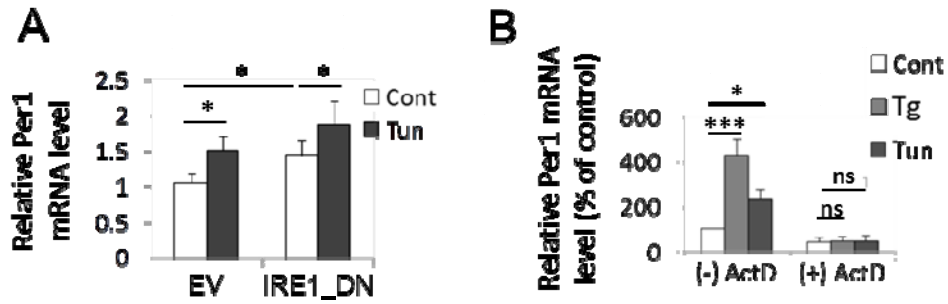

**Figure S6:** stress independent regulation of *PER1* by IRE1 $\alpha$ . **(A)** Total RNA was isolated in EV or IRE1\_DN cells treated or not with tunicamycin (Tun, 10  $\mu$ g/ml, 6 h). **(B)** Total RNA was isolated in U87 cells treated or not with tunicamycin (Tun, 10  $\mu$ g/ml, 6 h), thapsigargin (Tg, 1  $\mu$ M, 6 h) and/or actinomycin D (ActD, 5  $\mu$ g/ml, 6 h). *PER1* mRNA levels were measured by RT-qPCR. Data are presented as the mean  $\pm$  SD. Statistical significance: \*,  $p < 0.05$ ; \*\*\*  $p < 0.001$ . In **(A)**, *Per1* mRNA levels increased under stress and in IRE1\_DN compared to EV cells. In **(B)**, following transcription blocking by ActD, the modulation of *Per1* mRNA level by ER stressors was abrogated. This showed that *PER1* mRNA cleavage by IRE1 $\alpha$  was not increased under ER stress.

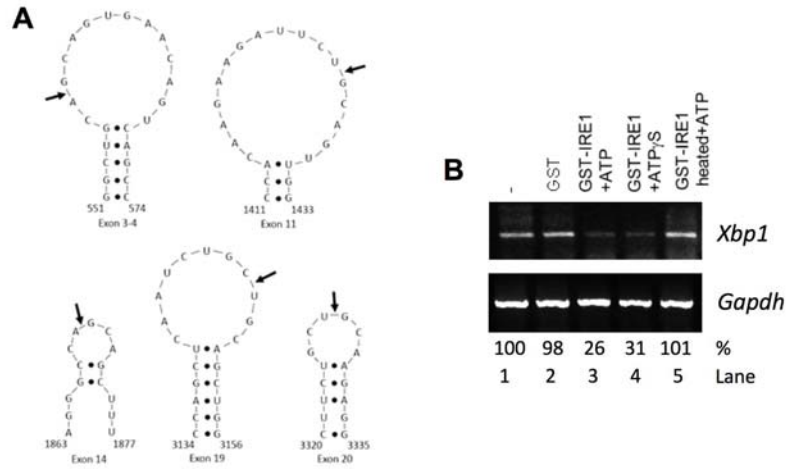

**Figure S7:** (A) Two-dimensional modeling of potential *Per1* mRNA cleavage sites using the M-Fold program. This reveals that most of the sites predicted from the alignment form P-Loops, structures necessary for IRE1 $\alpha$ -mediated cleavage. (B) *In vitro* RNA cleavage assay. Total RNA extracted from U87 cells was incubated with GST or GST-IRE1 $\alpha^{cyt0}$  in the presence of ATP for 2h at 37°C. RT-PCR was then performed to determine *Xbp1* and *Gapdh* mRNA levels.

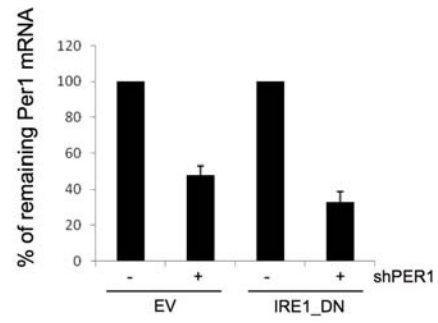

**Figure S8:** Expression of *Per1* mRNA in U87 cells upon lentiviral transduction. RT-PCR was used to measure *Per1* mRNA abundance. All values were normalized to *Gapdh* expression.

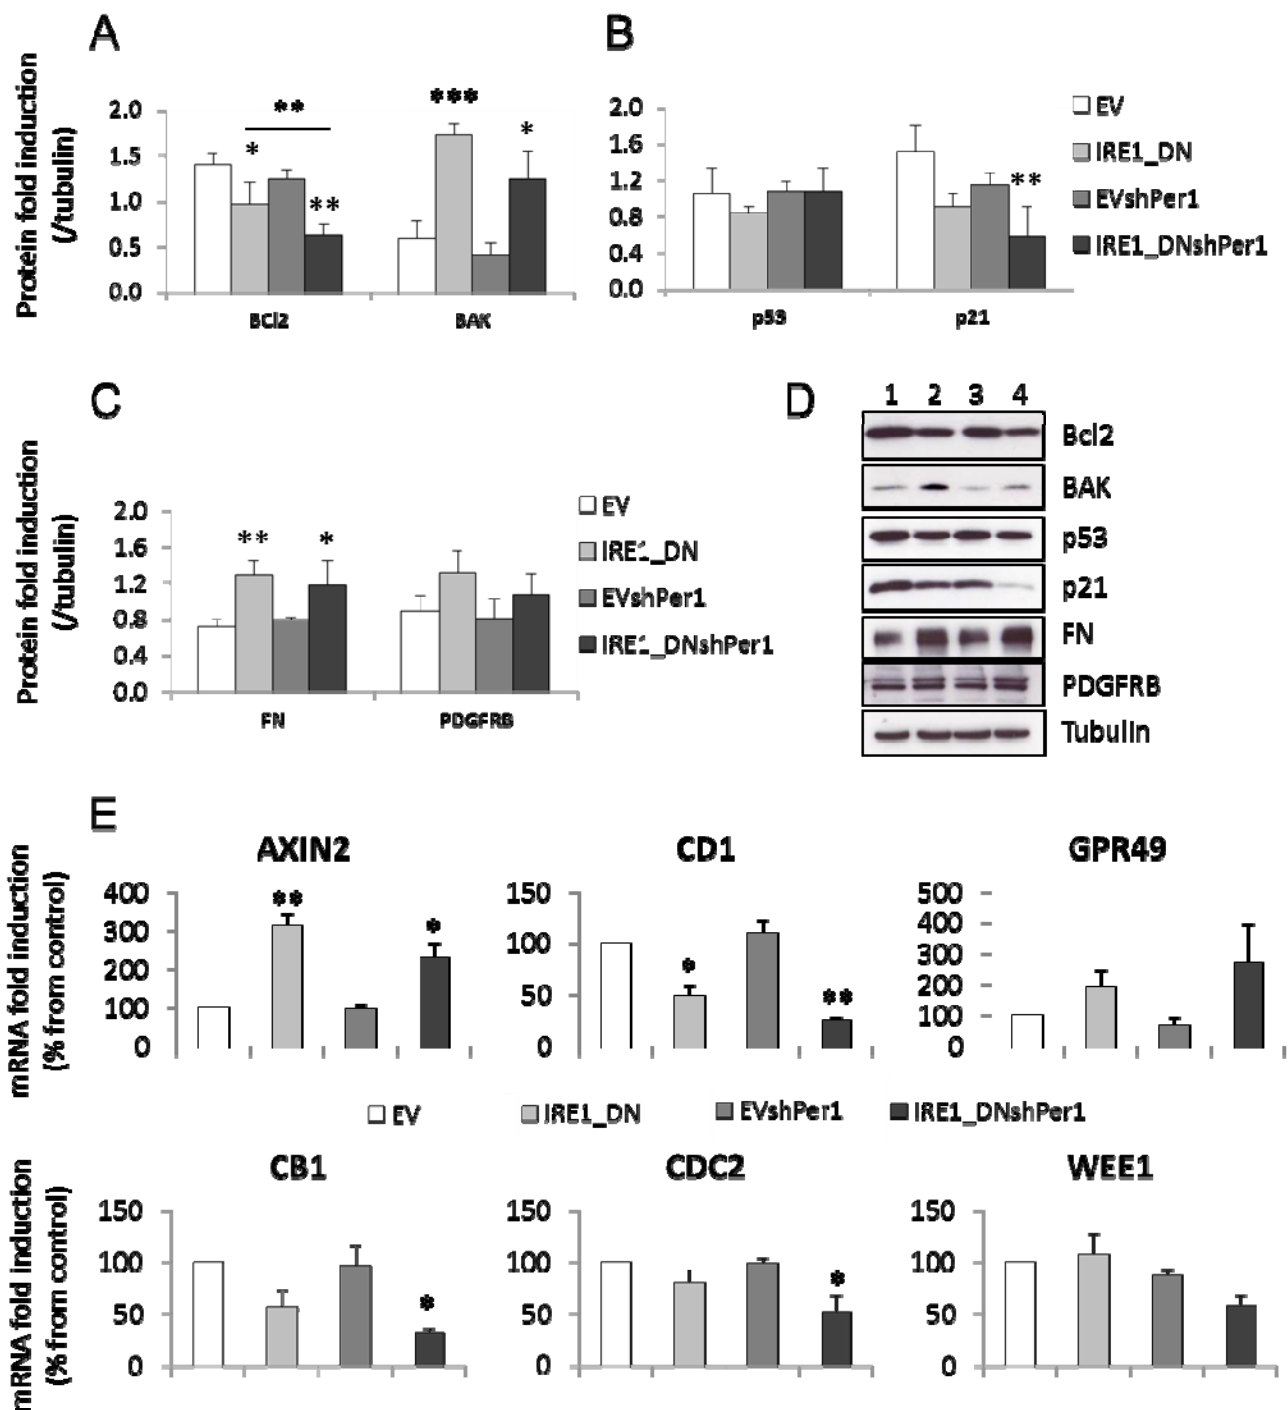

**Figure S9:** determination of protein (A-D) and mRNA (E) expression levels of potential PER1 targets in EV and IRE1\_DN cells transduced or not with shPER1. mRNA expression levels were determined using RT-qPCR. FN, fibronectin; CD1, cyclin D1; CB1, cyclin B1. Data are presented as the mean  $\pm$  SD for protein and mean  $\pm$  SEM for mRNA. Statistical significance: \*,  $p < 0.05$ ; \*\*  $p < 0.01$ ; \*\*\*  $p < 0.001$ . (A-C) show the quantification of immunoblots. (D) a representative immunoblot is presented for the corresponding proteins. Column 1, EV; 2, IRE1\_DN; 3, EVshPER1; 4, IRE1\_DNshPER1.

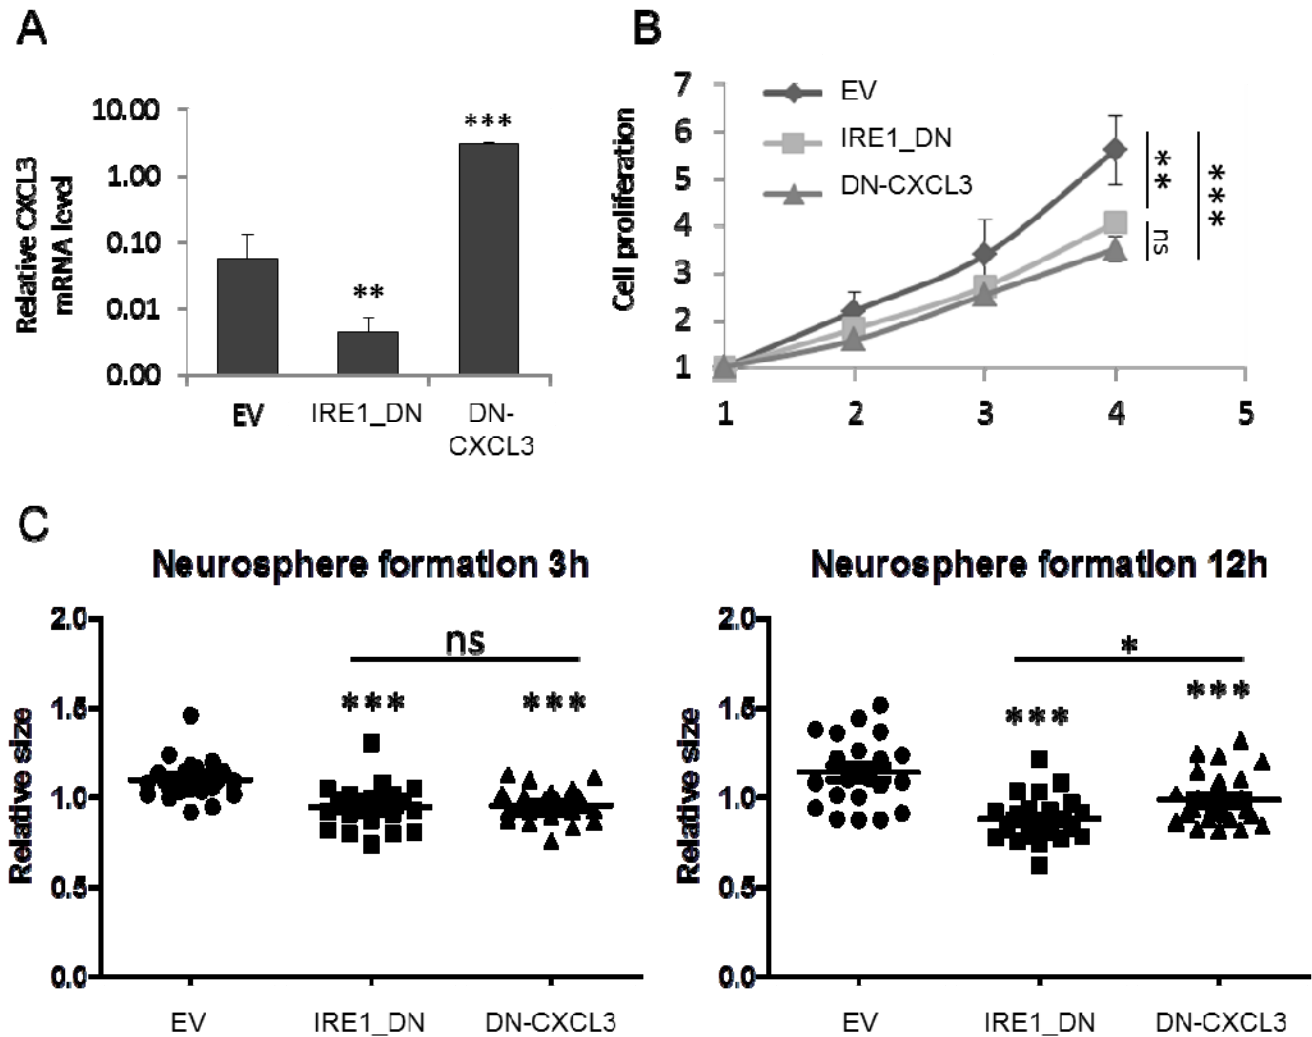

**Figure S10:** impact of CXCL3 re-expression on cell proliferation and neurosphere formation in IRE1\_DN cells. **(A)** *CXCL3* mRNA level was measured by RT-qPCR in EV, IRE1\_DN and IRE1\_DN cells transduced with CXCL3 ORF (DN-CXCL3) (Fermentas, USA). **(B)** cell proliferation was assessed by sulforhodamine B assay for the corresponding time (days). **(C)** the ability of corresponding cells to form neurospheres was evaluated 3 and 12 h after seeding. Areas of the neurospheres were estimated by the Image J software. Data are presented as the mean  $\pm$  SD (**A and B**) and mean  $\pm$  SEM (**C**). Statistical significance: \*,  $p < 0.05$ ; \*\*  $p < 0.01$ ; \*\*\*  $p < 0.001$ .

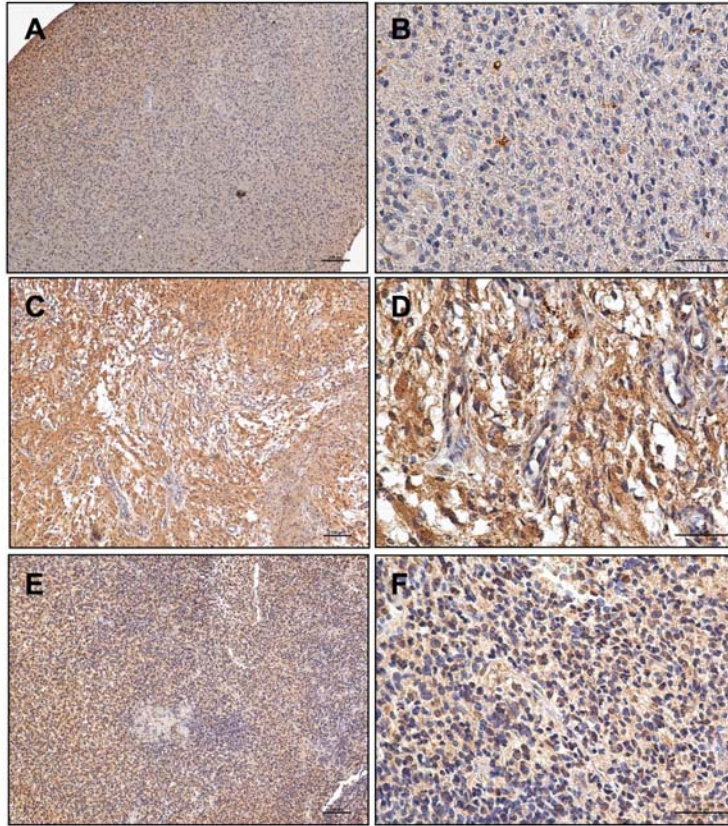

**Figure S11:** (A-F) Immunohistochemical analysis of 3 typical glioblastoma paraffin sections using anti sXBP1 antibodies. Higher magnification of A, C and E are shown in B, D and F respectively.
